# Supplementary material for: Tetrahexahedral PdRh nanocrystals with tunable composition as a highly efficient electrocatalyst for ethylene glycol oxidation
Source: Royal Society of Chemistry journal article supplement (doi:10.1039/d1ta00663k), 2021-01-01
Supplement: d1ta00663k1.pdf [file d1ta00663k1.pdf]

**Tetrahexahedral PdRh nanocrystals with tunable composition as highly efficient electrocatalyst for ethylene glycol oxidation**

Jing-Xiao Tang, Liang-Ping Xiao, Chi Xiao, Na Tian,\* Zhi-You Zhou and Shi-Gang Sun\*

State Key Laboratory of Physical Chemistry of Solid Surfaces, Collaborative Innovation Center of Chemistry for Energy Materials, College of Chemistry and Chemical Engineering, Xiamen University, Xiamen 361005, China.

## Chemicals and materials

Glassy-carbon electrode (99.99%,  $\Phi = 6$  mm) was purchased from Takai Carbon Co., LTD. (Tokyo, Japan). Commercial Pd/C (20 wt.%) was purchased from Alfa Aesar (Tianjin, China). NaOH, ethylene glycol and PdCl<sub>2</sub> were purchased from Sinopharm Chemical Reagent Co., LTD. (Shanghai, China). RhCl<sub>3</sub> was purchased from Aladdin Biochemical Technology Co., LTD. (Shanghai, China). Perchloric acid (EMSURE® ACS) was purchased from Merck. Argon (99.99%) and CO (99.9%) were purchased from Linde gas Co., LTD (Xiamen). All the chemicals were used as received without further purification. The ultra-pure water (18 M $\Omega$  cm) for cleaning glassware and solution preparation was produced from the Millipore system.

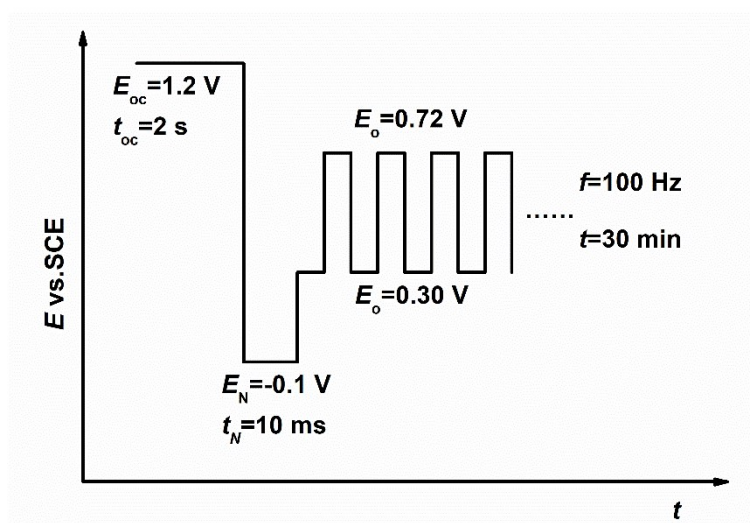

**Fig. S1** Scheme of pulse waveform applied for preparation of THH PdRh NCs, THH Pd NCs, and Rh nanoparticles.

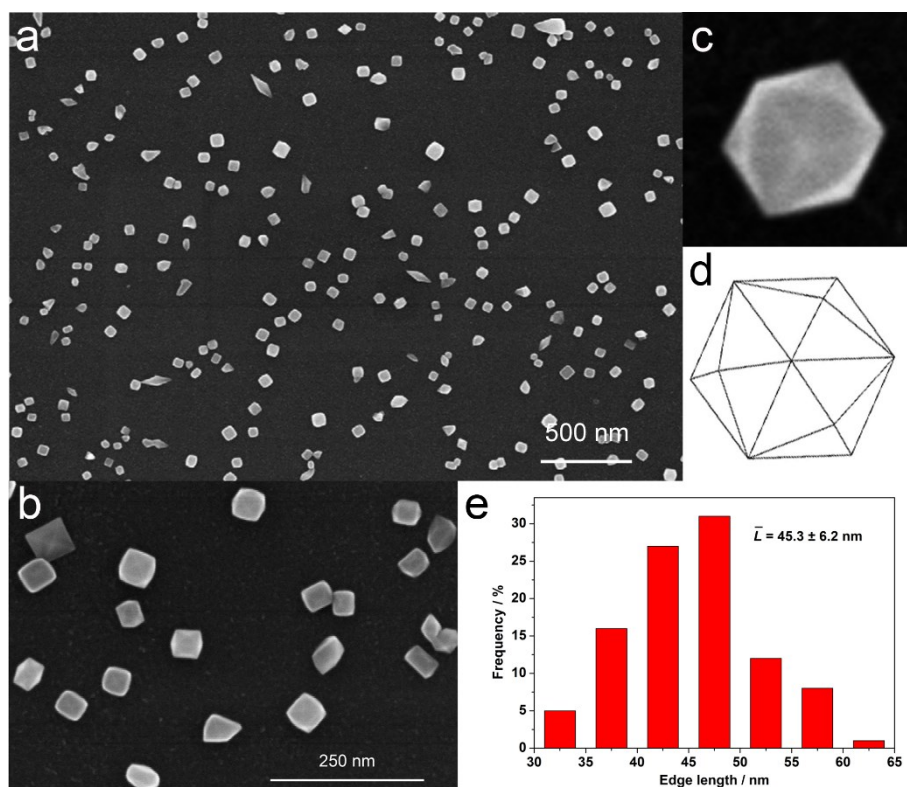

**Fig. S2** (a, b) Low- and (c) high-magnification SEM images of THH Pd<sub>86.9</sub>Rh<sub>13.1</sub> NCs. (d) Geometrical model of an ideal THH. (e) Histogram of edge length. The edge length distribution was determined by statistics of over 200 THH NCs.

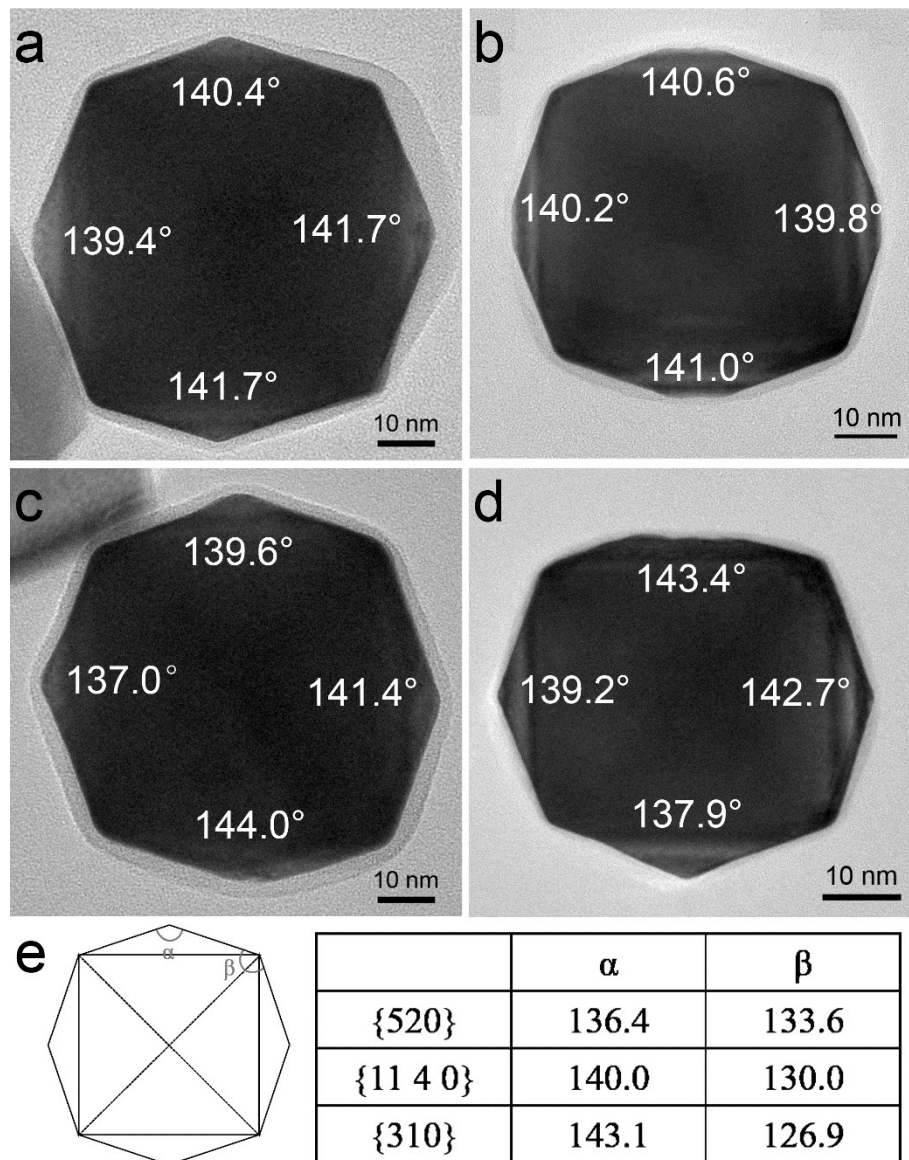

**Fig. S3** (a-d) TEM images of four individual THH Pd<sub>86.9</sub>Rh<sub>13.1</sub> NCs captured along [001] crystal axis and their interfacial angles. (e) Theoretical interfacial angles of THH bounded by different  $\{hk0\}$  facets.

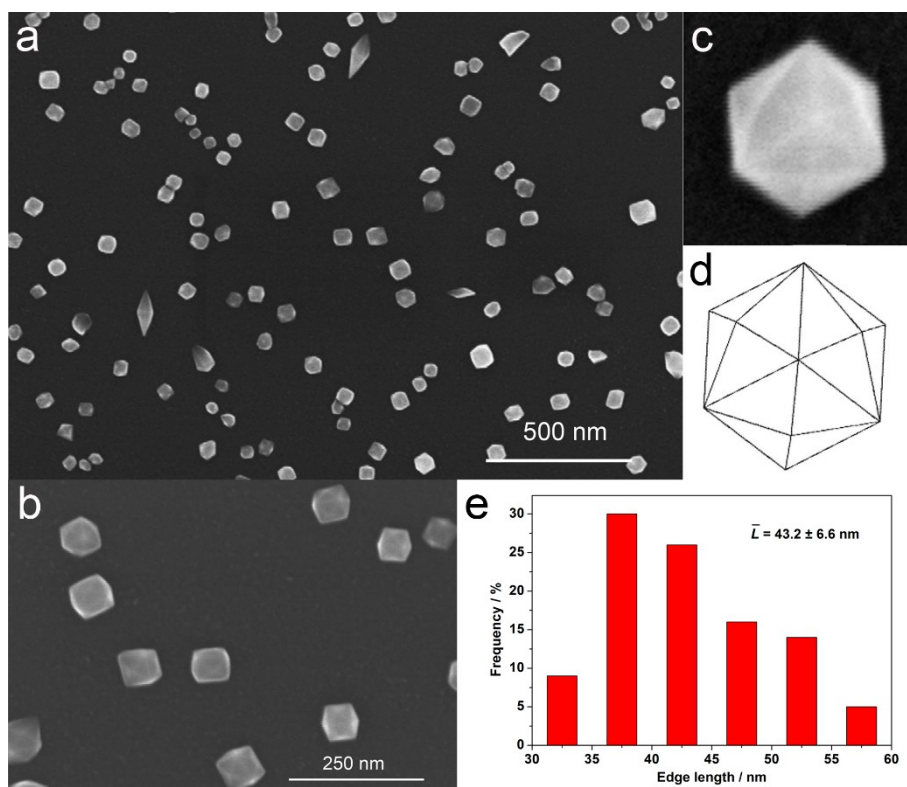

**Fig. S4** (a, b) Low- and (c) high-magnification SEM images of THH Pd<sub>90.1</sub>Rh<sub>9.9</sub> NCs. (d) Geometrical model of an ideal THH. (e) Histogram of edge length.

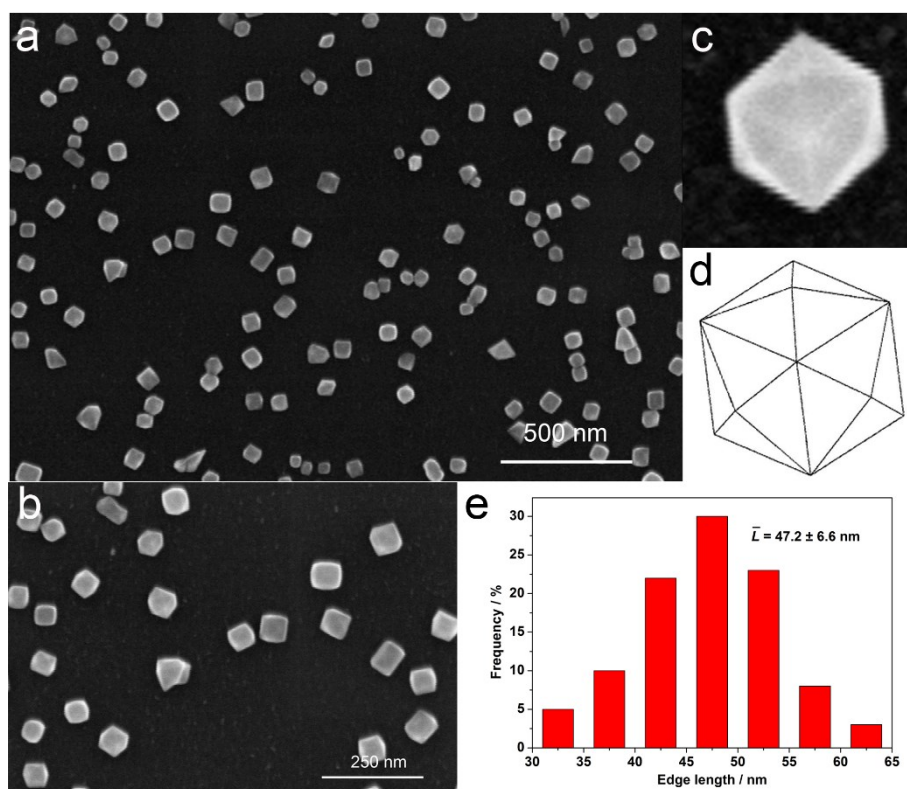

**Fig. S5** (a, b) Low- and (c) high-magnification SEM images of THH Pd<sub>92.8</sub>Rh<sub>7.2</sub> NCs. (d) Geometrical model of an ideal THH. (e) Histogram of edge length.

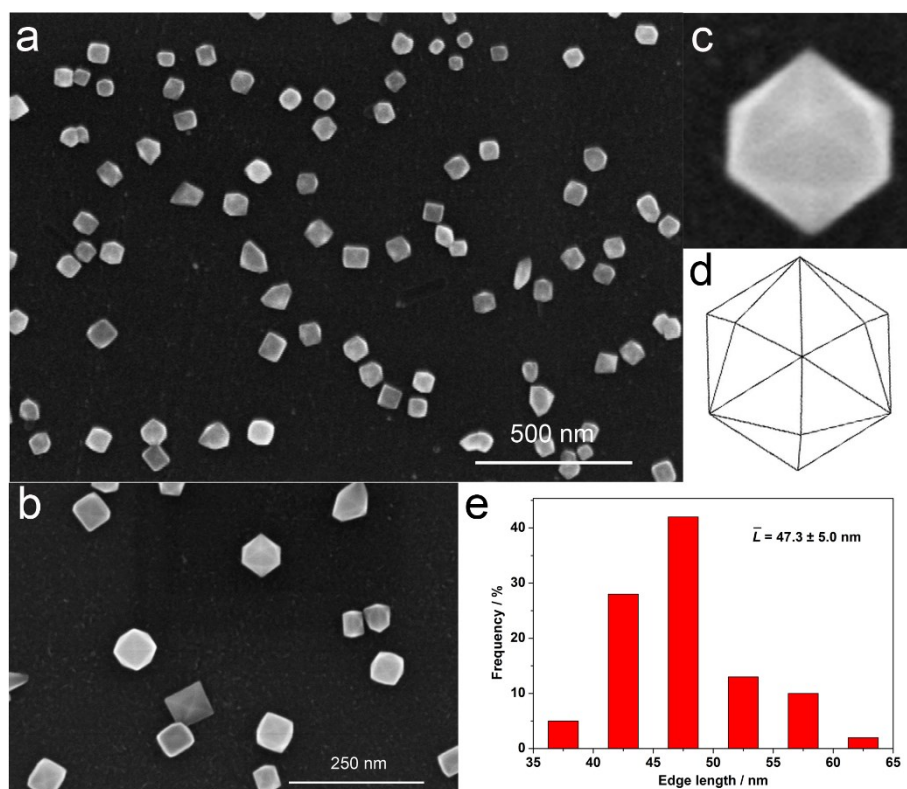

**Fig. S6** (a, b) Low- and (c) high-magnification SEM images of THH Pd<sub>94.6</sub>Rh<sub>5.4</sub> NCs. (d) Geometrical model of an ideal THH. (e) Histogram of edge length.

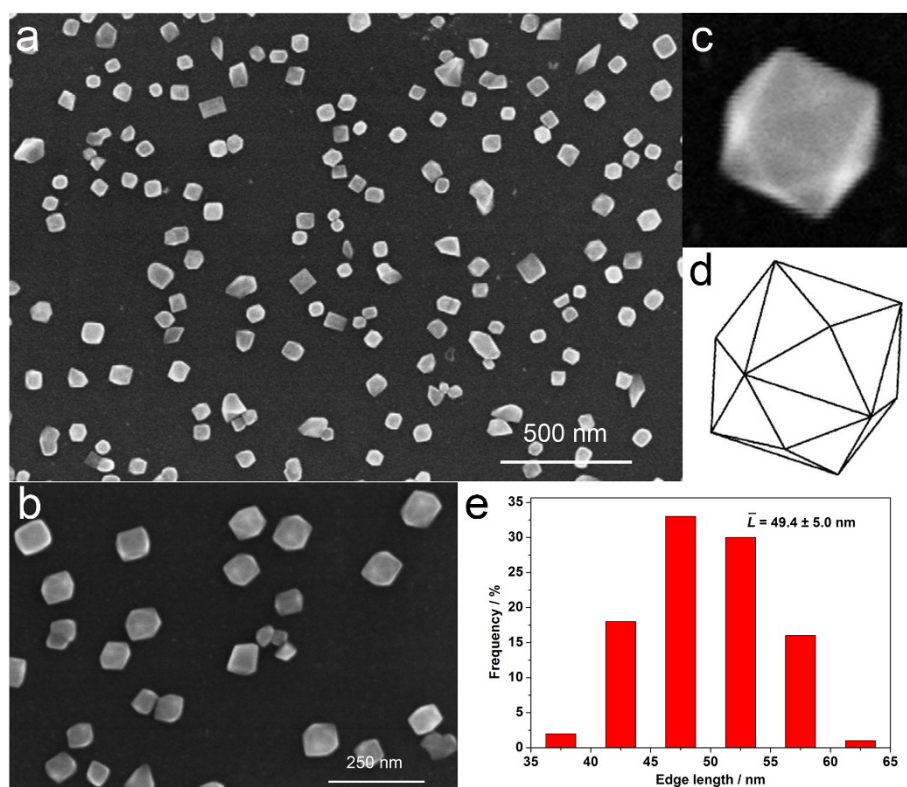

**Fig. S7** (a, b) Low- and (c) high-magnification SEM images of THH Pd NCs. (d) Geometrical model of an ideal THH. (e) Histogram of edge length.

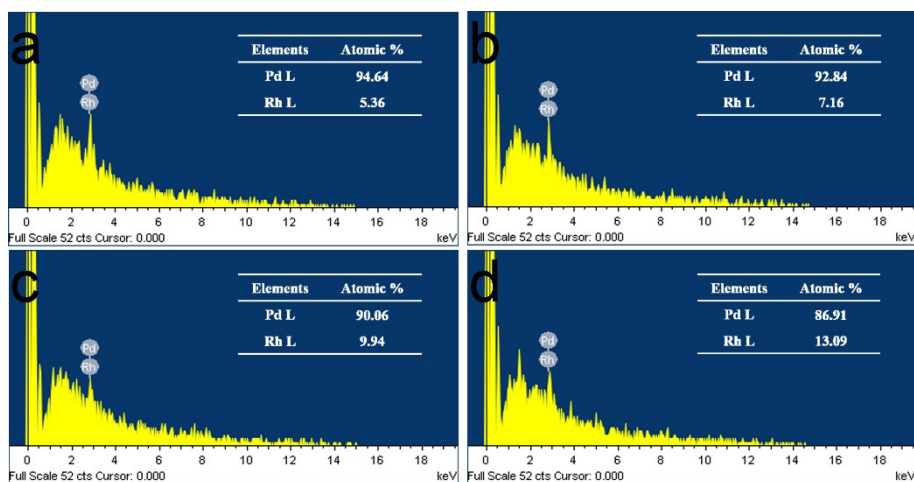

**Fig. S8** EDS spectra of THH PdRh NCs. (a) THH Pd<sub>94.6</sub>Rh<sub>5.4</sub>NCs; (b) THH Pd<sub>92.8</sub>Rh<sub>7.2</sub>NCs; (c) THH Pd<sub>90.1</sub>Rh<sub>9.9</sub> NCs; (d) THH Pd<sub>86.9</sub>Rh<sub>13.1</sub> NCs.

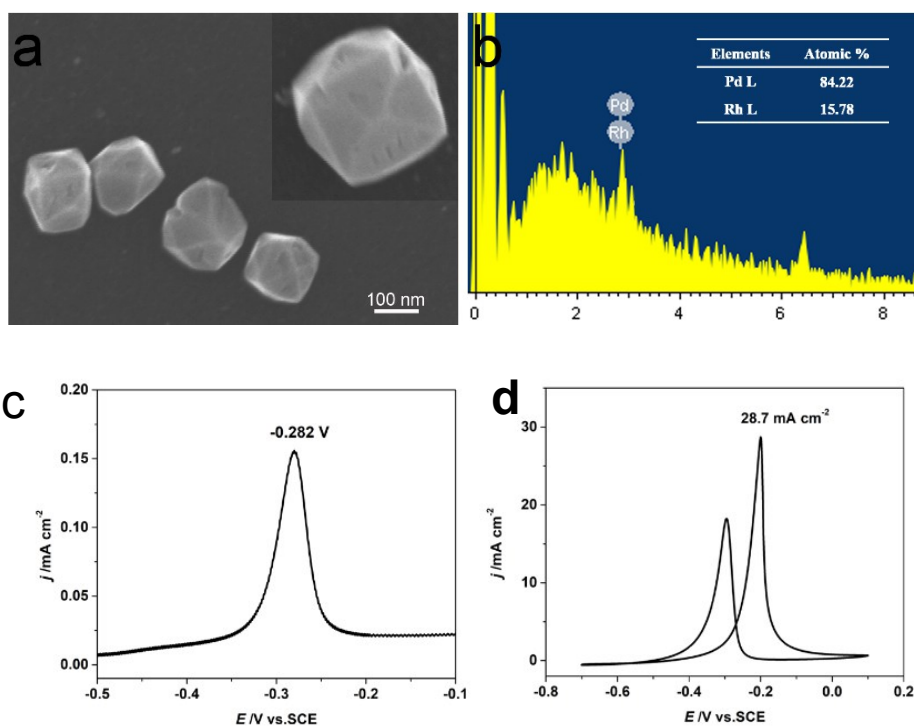

**Fig. S9** (a) SEM image and (b) EDS of Pd<sub>84.2</sub>Rh<sub>15.8</sub> NCs prepared in 0.2 mM PdCl<sub>2</sub> + 0.2 mM RhCl<sub>3</sub> solution. The THH shape is imperfect. (c) CO stripping on imperfect THH Pd<sub>84.2</sub>Rh<sub>15.8</sub> NCs in 0.1 M NaOH. Scan rate: 20 mV s<sup>-1</sup>. (d) Cyclic voltammogram of EG electrooxidation on imperfect THH Pd<sub>84.2</sub>Rh<sub>15.8</sub> NCs in 1 M NaOH + 1 M EG solution at 50 mV s<sup>-1</sup>.

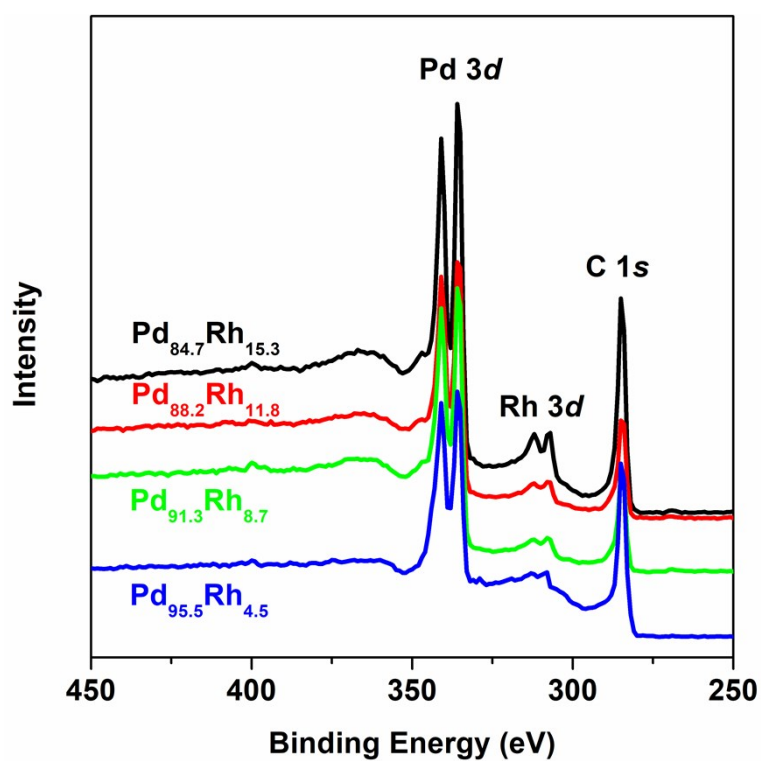

**Fig. S10** XPS of THH PdRh NCs.

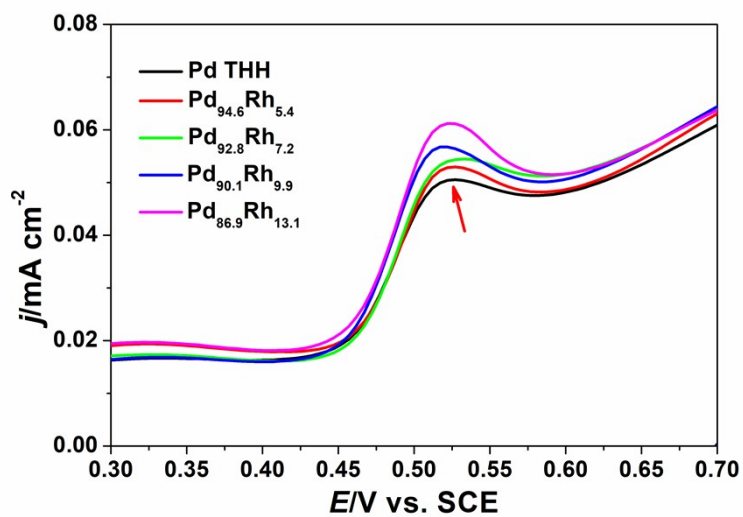

**Fig. S11** Enlarged voltammograms of THH PdRh NCs and THH Pd NCs recorded in 0.1 M HClO<sub>4</sub>. Scan rate: 50 mV s<sup>-1</sup>.



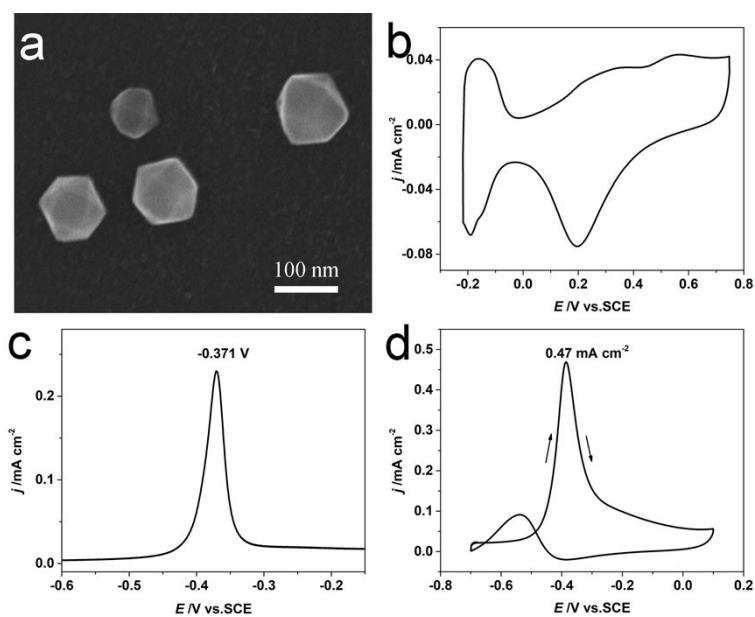

**Fig. S12** (a) SEM image of THH Rh NCs. (b) Cyclic voltammogram of THH Rh NCs in 0.1 M  $\text{HClO}_4$ . Scan rate:  $50 \text{ mV s}^{-1}$ . (c) CO stripping on THH Rh NCs. Scan rate:  $20 \text{ mV s}^{-1}$ . (d) Cyclic voltammogram of EG electrooxidation on THH Rh NCs in 1 M  $\text{NaOH} + 1 \text{ M EG}$  solution at  $50 \text{ mV s}^{-1}$ .

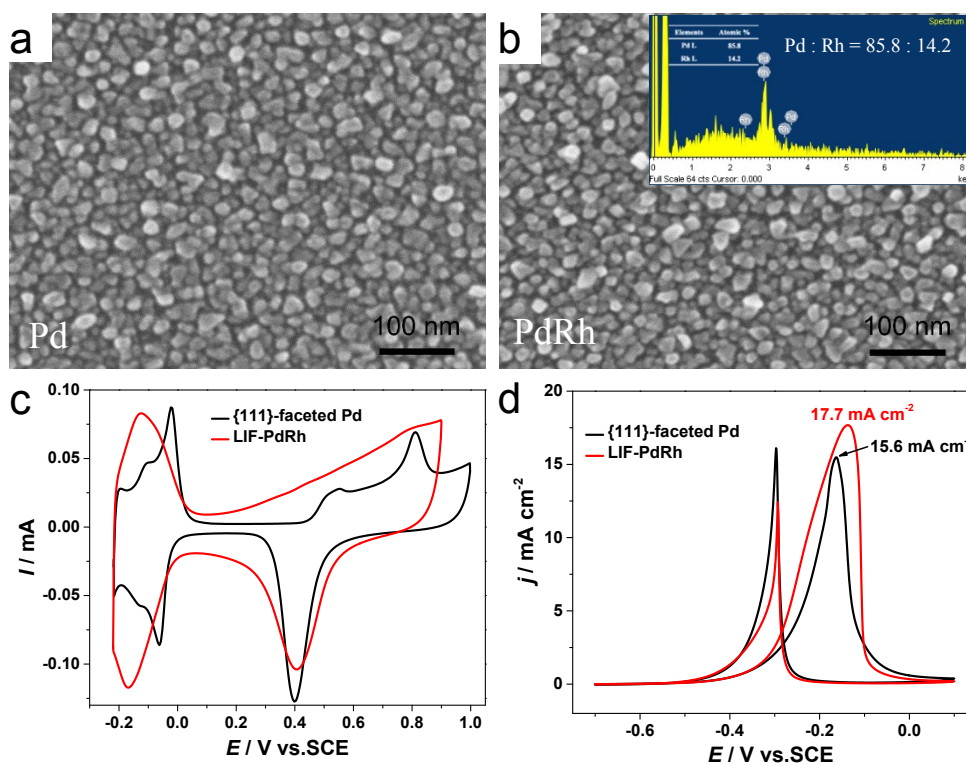

**Fig. S13** (a, b) SEM images of {111}-faceted Pd NCs (a) and low-index faceted (LIF) PdRh NCs (b). inset is the EDS of LIF-PdRh NCs. (c) Cyclic voltammograms of {111}-faceted Pd and LIF-PdRh NCs recorded in 0.1 M HClO<sub>4</sub> at 50 mV s<sup>-1</sup>. The Pd NCs show characteristic peak at about 0.80 V for oxygen species adsorption on Pd(111) [1]. (d) Cyclic voltammograms of EG electrooxidation on {111}-faceted Pd and LIF-PdRh NCs in 1 M NaOH + 1 M EG solution at 50 mV s<sup>-1</sup>.

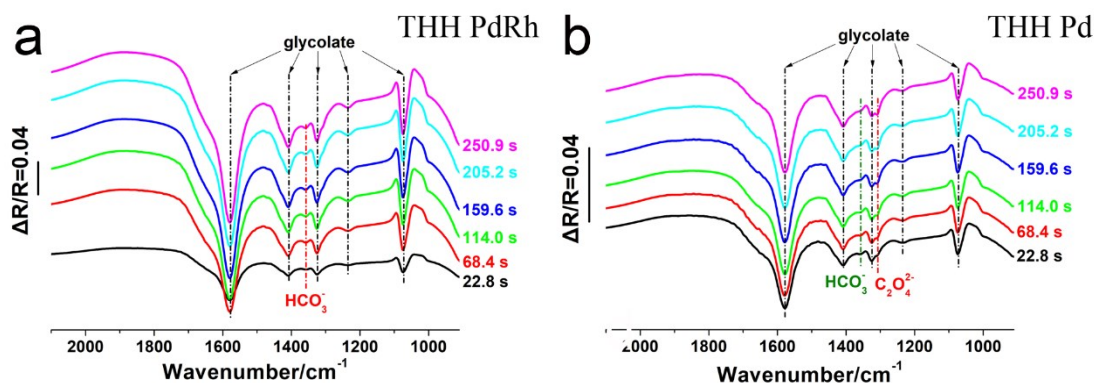

**Fig. S14** TRFTIR spectra of THH Pd<sub>86.9</sub>Rh<sub>13.1</sub> NCs (a) and THH Pd NCs (b) in 1 M EG + 1 M NaOH solution.  $E_S = -0.20$  V,  $E_R = -0.70$  V. Time interval: 45 s.

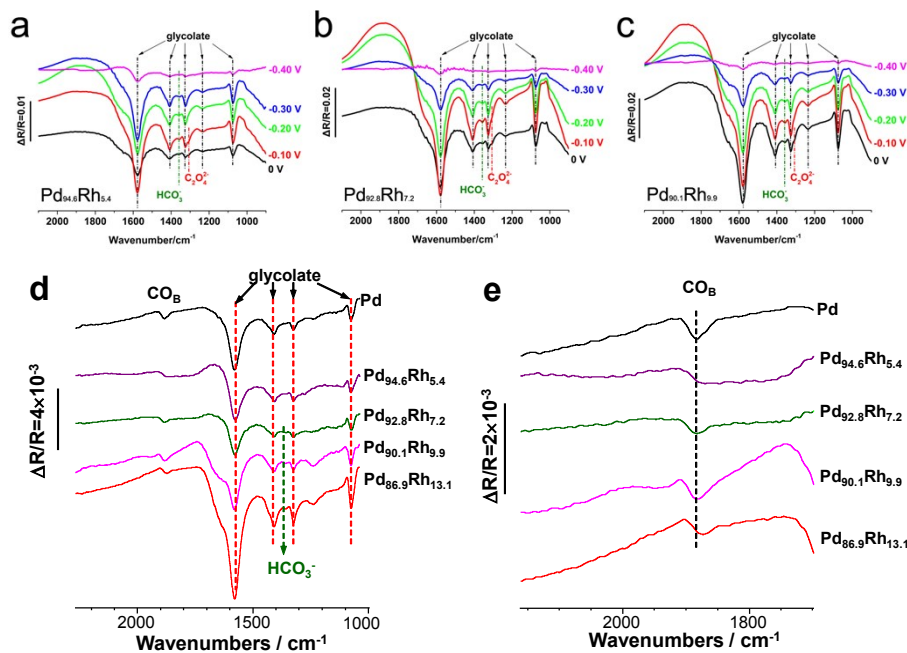

**Fig. S15** In situ FTIR spectra of EG electrooxidation on (a) THH Pd<sub>94.6</sub>Rh<sub>5.4</sub> NCs, (b) THH Pd<sub>92.8</sub>Rh<sub>7.2</sub> NCs, and (c) THH Pd<sub>90.1</sub>Rh<sub>9.9</sub> NCs at different potential.  $E_S = -0.40 \sim 0$  V,  $E_R = -0.70$  V, solution: 1 M EG + 1 M NaOH; Spectral resolution: 8 cm<sup>-1</sup>. (d) Comparison of in situ FTIR spectra collected at -0.40 V for THH Pd NC and THH PdRh NCs. (e) Enlarged spectra of adsorbed CO. THH Pd NCs show more bridge-bonded CO (CO<sub>B</sub>) than THH PdRh NCs.

**Table S1** SEM-EDS and XPS results of THH PdRh NCs.

|                                       | Pd/Rh<br>(EDS) | Pd/Rh<br>(XPS) |
|---------------------------------------|----------------|----------------|
| Pd <sub>94.6</sub> Rh <sub>5.4</sub>  | 94.6:5.4       | 95.5:4.5       |
| Pd <sub>92.8</sub> Rh <sub>7.2</sub>  | 92.8:7.2       | 91.3:8.7       |
| Pd <sub>90.1</sub> Rh <sub>9.9</sub>  | 90.1:9.9       | 88.2:11.8      |
| Pd <sub>86.9</sub> Rh <sub>13.1</sub> | 86.9:13.1      | 84.7:15.3      |

**Table S2** Binding energy (BE) and relative intensity obtained from Pd 3d and Rh 3d XPS spectra of THH Pd<sub>86.9</sub>Rh<sub>13.1</sub> NCs.

| Species             | BE<br>(eV) | Relative<br>intensity<br>(%) | Species                        | BE<br>(eV) | Relative<br>intensity<br>(%) |
|---------------------|------------|------------------------------|--------------------------------|------------|------------------------------|
| Pd(0)               | 335.5      | 33.2                         | Rh(0)                          | 307.4      | 51.9                         |
| Pd(OH) <sub>x</sub> | 335.9      | 34.2                         | Rh <sub>2</sub> O <sub>3</sub> | 308.4      | 25.5                         |
| PdO                 | 336.3      | 19.2                         | RhCl <sub>3</sub>              | 310.2      | 22.6                         |
| PdO <sub>2</sub>    | 338.0      | 13.4                         |                                |            |                              |

**Table S3** Onset and peak potential of CO stripping and ECSA of different catalysts.

|                                       | $E_{\text{onset}} / \text{V}$ | $E_{\text{p}} / \text{V}$ | ECSA / cm <sup>2</sup> |
|---------------------------------------|-------------------------------|---------------------------|------------------------|
| THH Pd NCs                            | -0.280                        | -0.191                    | 0.135                  |
| Pd <sub>94.6</sub> Rh <sub>5.4</sub>  | -0.314                        | -0.251                    | 0.133                  |
| Pd <sub>92.8</sub> Rh <sub>7.2</sub>  | -0.340                        | -0.263                    | 0.124                  |
| Pd <sub>90.1</sub> Rh <sub>9.9</sub>  | -0.350                        | -0.271                    | 0.131                  |
| Pd <sub>86.9</sub> Rh <sub>13.1</sub> | -0.354                        | -0.278                    | 0.123                  |
| Pd/C                                  | -0.266                        | -0.151                    | 0.823                  |

**Table S4** Comparison of catalytic performance for EG oxidation on different catalysts.

|                                       | $E_{p,f} / \text{V}$ | $j_f / \text{mA cm}^{-2}$ | $j_b / \text{mA cm}^{-2}$ |
|---------------------------------------|----------------------|---------------------------|---------------------------|
| THH Pd NCs                            | -0.184               | 21.8                      | 18.3                      |
| Pd <sub>94.6</sub> Rh <sub>5.4</sub>  | -0.197               | 31.6                      | 20.7                      |
| Pd <sub>92.8</sub> Rh <sub>7.2</sub>  | -0.198               | 34.4                      | 21.9                      |
| Pd <sub>90.1</sub> Rh <sub>9.9</sub>  | -0.197               | 38.8                      | 21.9                      |
| Pd <sub>86.9</sub> Rh <sub>13.1</sub> | -0.200               | 43.7                      | 22.4                      |
| Pd/C                                  | -0.149               | 3.93                      | 3.21                      |

$E_{p,f}$ : Peak potential in the forward scan;

$j_f$ : Peak current density in the forward scan;

$j_b$ : Peak current density in the backward scan.

**Table S5** Comparison of catalytic activities of various catalysts for EG electrooxidation.

| Catalysts                                                      | Electrolyte           | $j_f / \text{mA cm}^{-2}$ | Refs      |
|----------------------------------------------------------------|-----------------------|---------------------------|-----------|
| THH Pd <sub>86.9</sub> Rh <sub>13.1</sub> NCs                  | 1 M EG + 1 M NaOH     | 43.70                     | This work |
| Screw-like Pd <sub>1</sub> Pt <sub>1</sub> nanowires           | 0.5 M EG + 0.5 M NaOH | 16.93                     | 2         |
| Pd <sub>55</sub> Pt <sub>30</sub> nanowires networks           | 0.5 M EG + 0.5 M KOH  | 15.19                     | 3         |
| Pd <sub>62</sub> Au <sub>21</sub> Ni <sub>17</sub> nanosponges | 0.5 M EG + 0.5 M KOH  | 17                        | 4         |
| PtPdCo nanoflowers                                             | 0.5 M EG + 1 M KOH    | 7.22                      | 5         |
| PtPd@Pt NCs/rGO                                                | 0.5 M EG + 0.5 M KOH  | 1.88                      | 6         |
| PdPt nanodendrites                                             | 0.5 M EG + 1 M KOH    | 5.2                       | 7         |
| PdCo nanodendrites                                             |                       | 3.33                      |           |
| PdNi nanodendrites                                             |                       | 1.83                      |           |
| PdPt multipods                                                 | 1 M EG + 1 M KOH      | 8.42                      | 8         |
| PtNi nanowires                                                 | 0.5 M EG + 0.5 M KOH  | 9.6                       | 9         |
| PdPtNi nanowires                                               |                       | 15.9                      |           |
| PdNi nanowires                                                 |                       | 8.9                       |           |
| Core-shell Pd <sub>3</sub> Pb@Pd aerogels                      | 0.5 M EG + 1 M KOH    | 15.31                     | 10        |
| Pt <sub>4</sub> Rh nanocubes                                   | 1 M EG + 1 M KOH      | 11.6                      | 11        |

All scan rates are 50 mV s<sup>-1</sup>.

**Table S6** IR bands and their assignment of EG electrooxidation on THH Pd<sub>86.9</sub>Rh<sub>13.1</sub> NCs and THH Pd NCs.

| Species                                     | Band center / cm <sup>-1</sup> |
|---------------------------------------------|--------------------------------|
| CO <sub>B</sub>                             | 1884                           |
| glycolate                                   | 1580, 1410, 1326, 1234, 1075   |
| C <sub>2</sub> O <sub>4</sub> <sup>2-</sup> | 1308                           |
| HCO <sub>3</sub> <sup>-</sup>               | 1357                           |

### Supplementary References

- [1] K. Sashikata, Y. Matsui, and K. Itaya, *J. Phys. Chem.*, 1996, **100**, 20027–20034.
- [2] J. X. Tang, Q. S. Chen, L. X. You, H. G. Liao, S. G. Sun, S. G. Zhou, Z. N. Xu, Y. M. Chen and G. C. Guo, *J. Mater. Chem. A*, 2018, **6**, 2327–2336.
- [3] W. Hong, C. S. Shang, J. Wang, E. K. Wang, *Energy & Environ. Sci.*, 2015, **8**, 2910–2915.
- [4] S. P. Li, J. P. Lai, R. Luque, G. B. Xu, *Energy & Environ. Sci.*, 2016, **9**, 3097–3102.
- [5] P. Song, L. Liu, A. J. Wang, X. Zhang, S. Y. Zhou, J. J. Feng, *Electrochim. Acta*, 2015, **164**, 323–329.
- [6] L. Liu, X. X. Lin, S. Y. Zou, A. J. Wang, J. R. Chen, J. J. Feng, *Electrochim. Acta*, 2016, **187**, 576–583.
- [7] J. N. Zheng, L. L. He, F. Y. Chen, A. J. Wang, M. W. Xue, J. J. Feng, *J. Mater. Chem. A*, 2014, **2**, 12899–12906.
- [8] J. J. Lv, L. P. Mei, X. X. Weng, A. J. Wang, L. L. Chen, X. F. Liu, J. J. Feng, *Nanoscale*, 2015, **7**, 5699–5705.
- [9] Y. Wang, T. Y. Kou, H. Gao, J. Z. Niu, J. Zhang, L. F. Lv, Z. Q. Peng, Z. H. Zhang, *J. Mater. Chem. A*, 2018, **6**, 10525–10534.
- [10] C. Z. Zhu, Q. R. Shi, S. F. Fu, J. H. Song, D. Du, D. Su, M. H. Engelhard, Y. H. Lin, *J. Mater. Chem. A*, 2018, **6**, 7517–7521.
- [11] F. Gao, Y. P. Zhang, P. P. Song, J. Wang, T. X. Song, C. Wang, L. Song, Y. Shiraishi, Y. K. Du, *J. Mater. Chem. A*, 2019, **7**, 7891–7896.
